# Supplementary material
Source: PubMed Central journal article supplement (PMC3632308)
Supplement: NIHMS457192-supplement-1_si_001.pdf [file NIHMS457192-supplement-1_si_001.pdf]

## Supporting Information for

### Hydrogen bonding effects on the reactivity of $[\text{X-Fe}^{\text{III}}-\text{O-Fe}^{\text{IV}}=\text{O}]$ ( $\text{X} = \text{OH}, \text{F}$ ) complexes towards C–H bond cleavage

Genqiang Xue,<sup>‡</sup> Caiyun Geng,<sup>&</sup> Shengfa Ye,<sup>&</sup> Adam T. Fiedler,<sup>‡</sup> Frank Neese,<sup>&,\*</sup>  
and Lawrence Que, Jr. <sup>‡,\*</sup>

<sup>‡</sup>Department of Chemistry and Center for Metals in Biocatalysis, University of Minnesota,  
207 Pleasant St. SE, Minneapolis, Minnesota 55455, United States

<sup>&</sup>Max-Planck Institut für Chemische Energiekonversion, Stiftstr. 34-36, D-45470  
Mülheim an der Ruhr, Germany

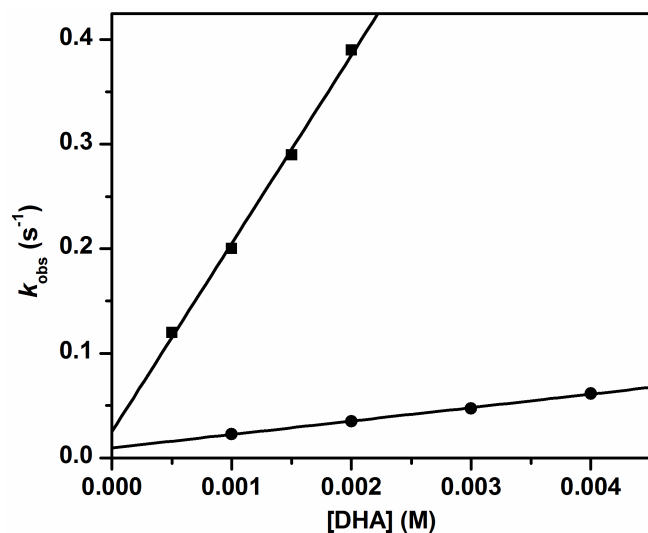

**Figure S1.**  $k_{\text{obs}}$  vs [substrate] plots for oxidation of DHA by **1-F** (squares) and **1-OH** (circles), with  $k_2$  of 180(6)  $\text{M}^{-1} \text{s}^{-1}$  and 12.8(4)  $\text{M}^{-1} \text{s}^{-1}$ , respectively. Conditions: in 3:1  $\text{CH}_2\text{Cl}_2$ -MeCN at  $-85^\circ\text{C}$ . For all experiments except one, **1-F** was generated from 0.2 mM **1**. For the oxidation of 0.5 mM DHA, **1-F** was generated from 0.1 mM **1**.

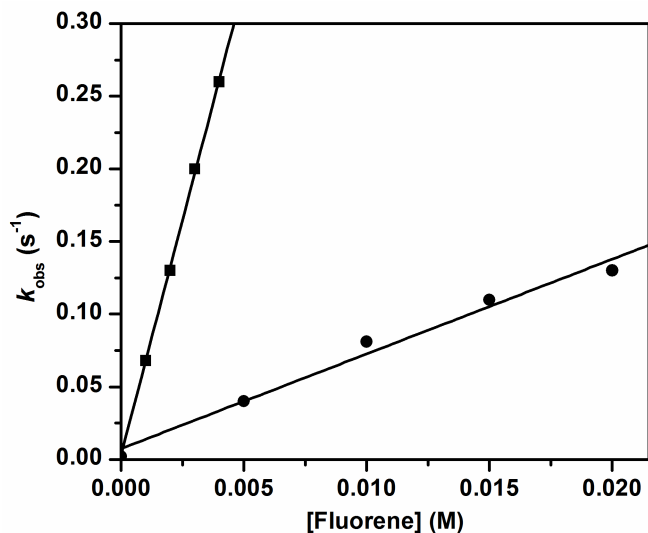

**Figure S2.**  $k_{\text{obs}}$  vs [substrate] plots for oxidation of fluorene by **1-F** (squares) and **1-OH** (circles), with  $k_2$  of 65(1)  $\text{M}^{-1} \text{s}^{-1}$  and 6.5(5)  $\text{M}^{-1} \text{s}^{-1}$ , respectively. Conditions: in 3:1  $\text{CH}_2\text{Cl}_2$ -MeCN at  $-80^\circ \text{C}$ .

### *Single-Scattering Analysis*

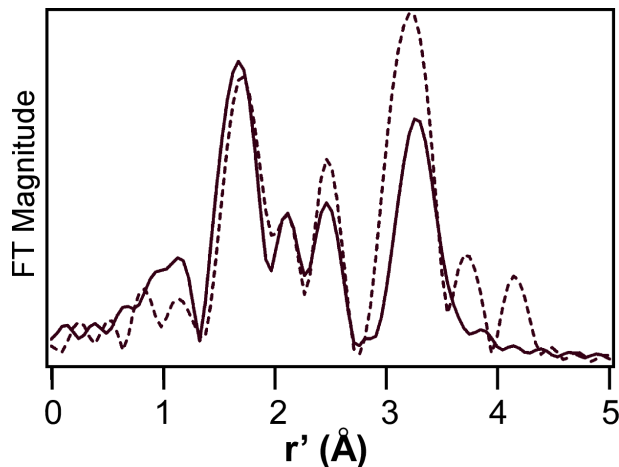

**Figure S3.** Experimental Fourier-transformed Fe K-edge data (dashed line) obtained at 10 K with a 2.1 mM solution of **1-F** in 3:1 PrCN:MeCN. Fourier-transform range:  $k = 2.1 - 14.5 \text{ \AA}^{-1}$ . The best fit (solid line) was obtained with the following parameters: 2 N/O at 1.80  $\text{\AA}$  ( $\Delta\sigma^2$ , 0.0084), 2 N/O at 2.07  $\text{\AA}$  (0.0025), 2 N/O at 2.18  $\text{\AA}$  (0.0005), 6 C at 2.99  $\text{\AA}$  (0.0074), and 1 Fe at 3.64  $\text{\AA}$  (0.0005). Only single-scattering mechanisms were included in the fit. Note the poor fit to the Fe scatterer feature at  $r = 3.2 \text{ \AA}$ , indicating the need to include multiple-scattering features.

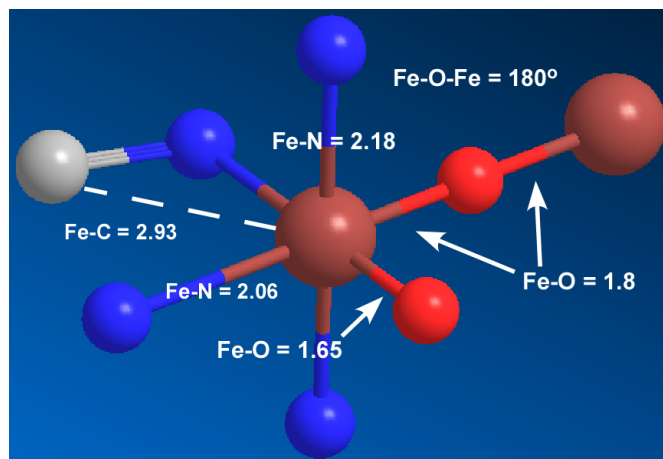

**Figure S4.** Model of **1-F** employed in *FEFF* calculations of the Fe K-edge EXAFS data. All bond angles around the “primary” Fe center were set to 90° and the O-Fe-O-Fe dihedral angle was set to 0°.

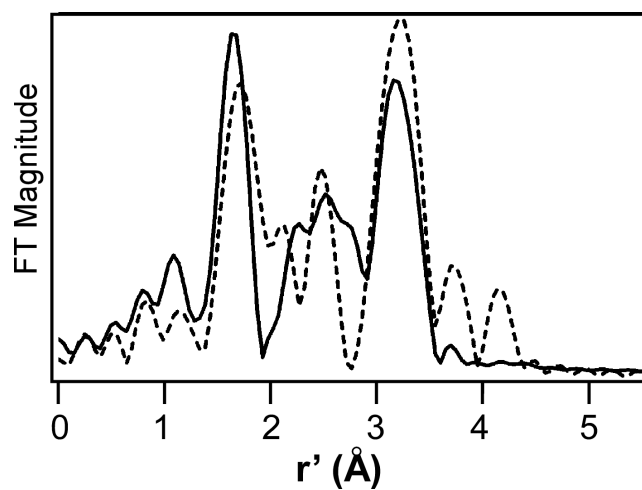

**Figure S5.** Solid line: Fourier-transform of Fe K-edge EXAFS data *computed* for **1-F** using the model shown in Figure S5 and the *FEFF* program. Dashed line: Experimental data obtained for **1-F**; Fourier-transformed range:  $k = 2.1 - 14.5 \text{ \AA}^{-1}$ .

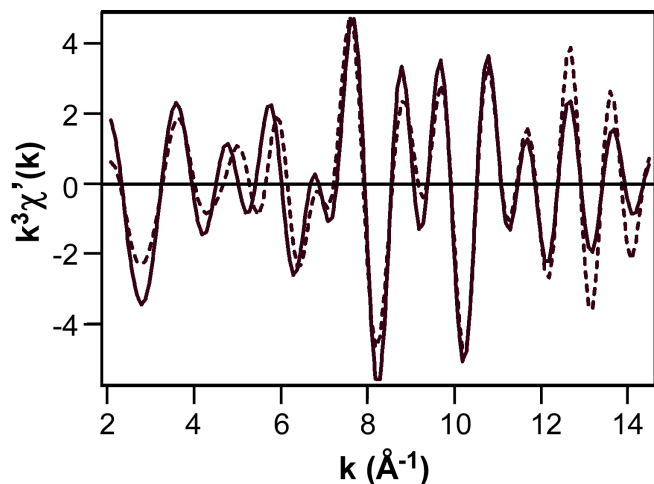

**Figure S6.** Experimental Fe K-edge data (dashed line) obtained at 10 K with a 2.1 mM solution of **1-F** in 3:1 PrCN:MeCN. Back-transformation range:  $r' = 0.13 - 4.30 \text{ \AA}$ . The best fit (solid line) was obtained with the following parameters: 0.5 O/N at 1.66  $\text{\AA}$  ( $\Delta\sigma^2$ , 0.0084), 1.5 O/N at 1.83  $\text{\AA}$  (0.0049), 1 N/O at 2.04  $\text{\AA}$  (0.0012), 3 N/O at 2.17 (0.0021), 6.5 C at 3.04  $\text{\AA}$  (0.0085), and 1 Fe at 3.56  $\text{\AA}$  (0.0037). The fit also included a multiple-scattering feature arising from the nearly linear Fe–O–Fe unit.

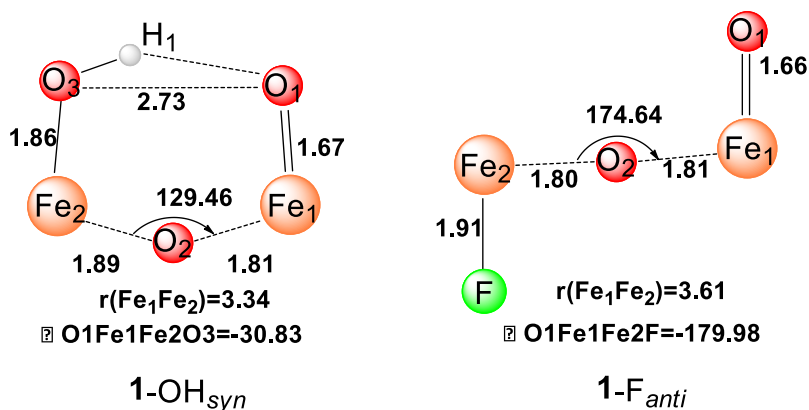

**Figure S7.** Geometric data from theoretical results for **1-OH<sub>syn</sub>** and **1-F<sub>anti</sub>** published in De Hont, R. F.; Xue, G.; Hendrich, M. P.; Que, L., Jr.; Bominaar, E. L.; Münck, E. *Inorg. Chem.* **2010**, *49*, 8310-8322.

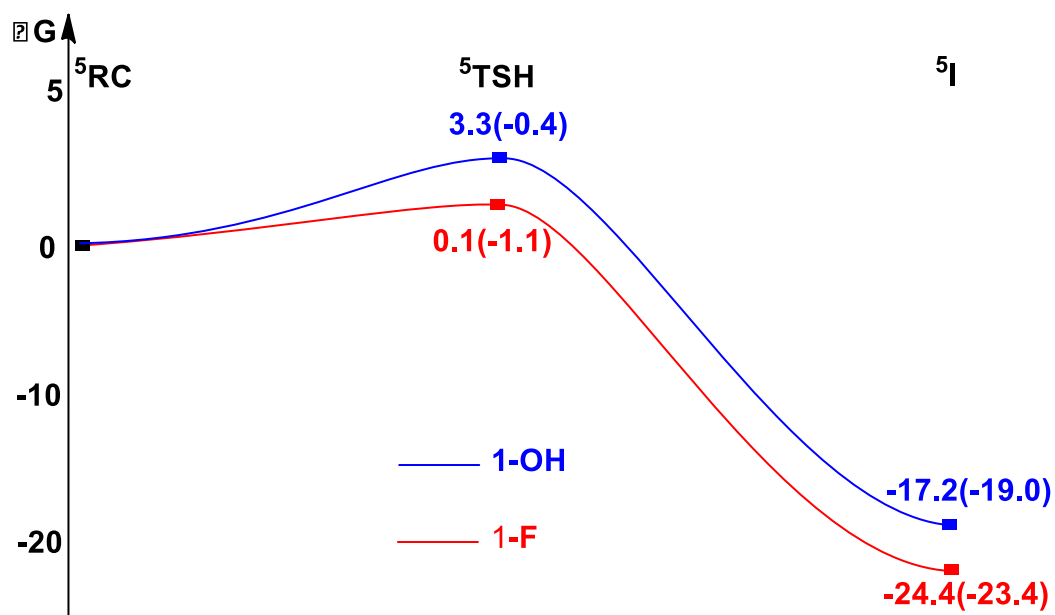

**Figure S8.** BP86 Calculated Schematic Gibbs free energy ( $\Delta G$ ) surfaces for DHA C-H bond activation by **1-OH<sub>syn</sub>** and **1-F<sub>anti</sub>**. In parentheses energies with inclusion of VDW effects are given.

**Table S1.** Rate constants measured for the Eyring plot for DHA oxidation by 1-OH (Figure 4).

|                       |     |     |     |     |                   |                   |
|-----------------------|-----|-----|-----|-----|-------------------|-------------------|
| T (°C)                | -85 | -80 | -70 | -60 | -50               | -40               |
| $k_2/(M^{-1} s^{-1})$ | 13  | 28  | 42  | 79  | $1.4 \times 10^2$ | $2.7 \times 10^2$ |

**Table S2.** Results derived from Gaussian fitting of the 1-F pre-edge features. Peak height is normalized to the Fe-edge height, area is in units of  $10^{-2}$  eV, and peak position ( $E_{1s \rightarrow 3d}$ ) was calculated after curve fitting by SSEXafs. The best fit to the data is #3.

| fit      | peak #   | height       | width      | area        | $E_{1s \rightarrow 3d}$ (eV) |
|----------|----------|--------------|------------|-------------|------------------------------|
| 1        | 1        | 0.061        | 3.60       | 23.3        | 7114.8                       |
| 2        | 1        | 0.051        | 2.0        | 10.8        | 7113.8                       |
|          | 2        | 0.047        | 2.0        | 10.0        | 7115.5                       |
|          | 3        | 0.016        | 2.0        | 3.4         | 7117.1                       |
| <b>3</b> | <b>1</b> | <b>0.056</b> | <b>2.2</b> | <b>13.4</b> | <b>7113.8</b>                |
|          | <b>2</b> | <b>0.039</b> | <b>1.8</b> | <b>7.5</b>  | <b>7115.5</b>                |
|          | <b>3</b> | <b>0.017</b> | <b>2.1</b> | <b>3.9</b>  | <b>7117.1</b>                |

**Table S3**, BP86 Calculated Geometry Parameters for the Key Points along the Reaction Pathways. Normal, with VDW effect. In parentheses, without VDW effect.

|                                    | r(Fe <sub>1</sub> -O <sub>1</sub> ) | r(Fe <sub>1</sub> -Fe <sub>2</sub> ) | ∠Fe <sub>1</sub> O <sub>2</sub> Fe <sub>2</sub> (°) | ∠O <sub>1</sub> Fe <sub>1</sub> Fe <sub>2</sub> O <sub>3</sub> (F) (°) | r(O <sub>1</sub> -O <sub>3</sub> ) | r(O <sub>1</sub> -H <sub>1</sub> ) | r(O <sub>1</sub> -H <sub>2</sub> ) | r(C-H <sub>2</sub> ) |
|------------------------------------|-------------------------------------|--------------------------------------|-----------------------------------------------------|------------------------------------------------------------------------|------------------------------------|------------------------------------|------------------------------------|----------------------|
| RC( <b>1</b> -OH <sub>syn</sub> )  | 1.68(1.69)                          | 3.23(3.32)                           | 126.94(131.71)                                      | -31.41(-5.62)                                                          | 2.67(2.60)                         | 1.69(1.61)                         | ~                                  | 1.11(1.11)           |
| TSH( <b>1</b> -OH <sub>syn</sub> ) | 1.76(1.77)                          | 3.24(3.33)                           | 127.62(132.98)                                      | -25.39(-19.00)                                                         | 2.68(2.74)                         | 1.71(1.76)                         | 1.20(1.23)                         | 1.34(1.35)           |
| IN( <b>1</b> -OH <sub>syn</sub> )  | 1.89(1.91)                          | 3.21(3.34)                           | 127.34(134.09)                                      | -36.21(-21.97)                                                         | 2.85(2.88)                         | 1.94(1.93)                         | 0.98(0.98)                         | 3.33(2.48)           |
| RC( <b>1</b> -F <sub>anti</sub> )  | 1.67(1.67)                          | 3.55(3.53)                           | 173.68(146.45)                                      | -177.18(132.97)                                                        | ~                                  | ~                                  | ~                                  | 1.11(1.11)           |
| TSH( <b>1</b> -F <sub>anti</sub> ) | 1.74(1.75)                          | 3.54(3.60)                           | 165.60(168.28)                                      | 177.79(165.55)                                                         | ~                                  | ~                                  | 1.21(1.21)                         | 1.33(1.35)           |
| IN( <b>1</b> -F <sub>anti</sub> )  | 1.87(1.87)                          | 3.55(3.57)                           | 163.54(162.23)                                      | 173.25(168.34)                                                         | ~                                  | ~                                  | 0.98(0.97)                         | 2.30(5.50)           |
